# Supplementary material for: Experiences with a graduate course on sex and gender medicine in Korea
Source: PubMed Central journal article supplement (PMC6004513; doi:10.3352/jeehp.2018.15.13), 2018-05-04
Supplement: jeehp-15-13-suppl.pdf [file jeehp-15-13-suppl.pdf]

*Sex and Gender Medical Education Survey*

1. Please state the position in this class

- Student
- Teacher

2. What is your gender?

- Male
- Female

3. What's your final degree?

- MD
- PhD
- Nursing College Degree

4. Please state the timing of survey

- Pre-class
- Post-class

Q1 I am familiar with the issue of the sex and gender differences in medicine.

- Strongly disagree
- Disagree
- Neutral
- Agree
- Strongly agree

Q2 I am familiar with the term of 'gendered innovation'.

- Strongly disagree
- Disagree
- Neutral
- Agree
- Strongly agree

Q3 Sex and gender-based medicine is a fundamental aspect of precision medicine or researches.

- Strongly disagree
- Disagree
- Neutral
- Agree
- Strongly agree

Q4 Sex and gender issues should be integrated into routine medical curricula.

- Strongly disagree
- Disagree
- Neutral
- Agree
- Strongly agree

Q5 What's the most important to establish gender based medicine in biomedicine and researches? (first and second choice)

First choice

- Research funds
- Sex and Gender Medical education
- Case studies
- Government's policy
- International Network

Second choice

- Research funds
- Sex and Gender Medical education
- Case studies
- Government's policy
- International Network
